# Supplementary material
Source: PubMed Central journal article supplement (PMC9214588)
Supplement: jama-e228831-s003.pdf [file jama-e228831-s003.pdf]

## Supplemental Online Content

Marrouche NF, Wazni O, McGann C, et al. Effect of MRI-guided fibrosis ablation vs conventional catheter ablation on atrial arrhythmia recurrence in patients with persistent atrial fibrillation: the DECAAF II randomized clinical trial. *JAMA*. doi:10.1001/jama.2022.8831

**eAppendix.** Committees: Steering Committee, Data Safety and Monitoring Board, Data Coordinating Center

**eFigure 1.** Examples of Ablation Points Targeting Fibrosis and Scar-Coverage/Encirclement of Fibrosis at 3 Months in Each Level on the 5-Level Scale as Assessed on 3-Month MRI

**eFigure 2.** Completeness of ECG Transmissions in Both Treatment Arms

**eFigure 3.** Primary End Point by Fibrosis Stages <20% and ≥20%

**eTable 1.** Eligibility Criteria

**eTable 2.** Descriptive Statistics of Mean Fibrosis Covered/Encircled and Mean Fibrosis Targeted in Each Treatment Arm

**eTable 3.** Sensitivity Analyses for Estimating the Hazard Ratio Comparing the Primary Atrial-Arrhythmia Recurrence Composite Outcome Between the MRI-Guided and PVI-Only Treatment Groups

**eTable 4A.** Effects of Randomized Interventions on Quality of Life Outcomes: Prespecified Analysis

**eTable 4B.** Effects of Randomized Interventions on Quality of Life Outcomes: Post Hoc Sensitivity Analysis Including Site as a Random Effect

**eTable 5.** Efficacy Outcomes by Fibrosis Stages: <20% and ≥20%

**eTable 6.** Details of Strokes in First 30 Days

**eTable 7.** Safety Outcomes by Fibrosis Stages

This supplemental material has been provided by the authors to give readers additional information about their work.

## **eAppendix. Committees: Steering Committee, Data Safety and Monitoring Board, End Point Adverse Event Committee, Data Coordinating Center**

### **Steering Committee** (in alphabetical order)

The Steering Committee is composed of investigators who are expert in the field of electrophysiology, cardiac imaging and atrial fibrillation ablation. The committee was responsible for supporting the design and reviewing the conduct of the study. It helped to identify and resolve problems with recruitment and performance, and evaluated the recommendations of the Data and Safety Monitoring Board. It was also responsible for the early termination of the trial, and advised on appropriate adjudication of major events by the End Point and Adverse Events Committee. It reviewed the final report, and is accountable for presenting and publishing the study results in close collaboration with the sponsor, as well as for evaluating the proposed sub-studies.

Christian Mahnkopf, MD *Klinikum Coburg, Coburg, Germany*

David Wilber, MD *University of Chicago, Chicago, Illinois, USA*

Francis Marchlinski, MD *University of Pennsylvania, Philadelphia, Pennsylvania*

Gerhard Hindricks, MD, *University of Leipzig, Leipzig, Germany*

Hugh Calkins, MD *Johns Hopkins University, Baltimore, Maryland, USA*

Johannes Brachmann, MD *Klinikum Coburg, Coburg, Germany*

Moussa Mansour, MD *Massachusetts General Hospital, Boston, Massachusetts*

Nassir Marrouche, MD *Tulane University, New Orleans, Louisiana, USA*

Nazem Akoum, MD *University of Washington, Seattle, Washington, USA*

Oussama Wazni, MD *Cleveland Clinic, Cleveland, Ohio, USA*

Pierre Jais, MD *CHU de Bordeaux, Bordeaux, France*

Prashantan Sanders, MD *Adelaide University, Adelaide, Australia*

### **Data Safety and Monitoring Board**

The Data and Safety Monitoring Board is composed of four independent members.

The Data Safety and Monitoring Board was primarily responsible for ensuring the safety of the patients. Further responsibilities were to inform the sponsor about survival curve in the trial after the determined interim analysis, to formulate guidelines for the possible early termination of the study, to trigger unscheduled interim analysis if safety data indicate that treatment is associated with important adverse events, and to advise to stop the trial in case of an unacceptable patient risk exposure.

Chair: James D. Thomas, MD

Address: Galter Pavilion, 675 N St Clair St Ste 19-100, Chicago, IL 60611

Email: James.Thomas2@nm.org

Telephone: [\(312\) 664-3278](tel:3126643278)

Maria Mori Brooks, MD

Ralph Damiano, MD

Address: 4921 Parkview Pl Floor: 8, Suite: A, St. Louis, MO 63110

Email: damianor@wustl.edu

Telephone: [\(314\) 362-7327](tel:3143627327)

### **End Point Adverse Event Committee**

**eAppendix (continued). Committees: Steering Committee, Data Safety and Monitoring Board, End Point Adverse Event Committee, Data Coordinating Center**

The End Point and Adverse Event Committee is constituted of three experts in the field of ablation of atrial fibrillation. They have received blinded data regarding all serious adverse events, all deaths, all cerebrovascular accidents, and all first recurrences of atrial fibrillation, from the Contact Research Organization. The classification principles have been determined by the End Point and Adverse Event Committee in conjunction with the Steering Committee. The End Point and Adverse Event Committee was responsible for the classification of all received events, for the determination of which events fulfill the efficacy and safety end point criteria and for the classification of first atrial episode (atrial fibrillation recurrence or not).

Dhiraj Gupta, MD

Jason G. Andrade, MD

Boris Schmidt, MD

**Data Coordinating Center (DCC), University of Utah, Salt Lake City, UT**

J. M. Dean (DCC PI), L. Morrison-DeBoer (Project Manager), T. Greene (Biostatistician), R. Telford (Biostatistician), U Ott (Project Manager), R. Holubkov (Biostatistician), M. McFadden (Biostatistician), T Bardsley (Biostatistician), S. Zuspan (Program Director), H. Lee (Biostatistician), K. Lewis (Biostatistician), N. Pacchia, (Project Manager), E. Morrey, (Administrative Assistant), J. Yearley (Supervising Data Manager), A. Peterson (Supervising Data Manager), A. Webster (Statistics Manager), L. Young (IT Director), J. Wojdula (IT Director), B Conley (Data Manager), R. Enriquez (Informatics Director), D. DeMarco (Enterprise Infrastructure Architect), J. Brumett (Senior Software Design Engineer), M. Wunderlich (Senior Systems Administrator)

## Figures\*

**eFigure1.- Examples of Ablation Points Targeting Fibrosis (A) and Scar-Coverage/Encirclement of Fibrosis at 3 Months (B) in Each Level on the 5-Level Scale as Assessed on 3-Month MRI**

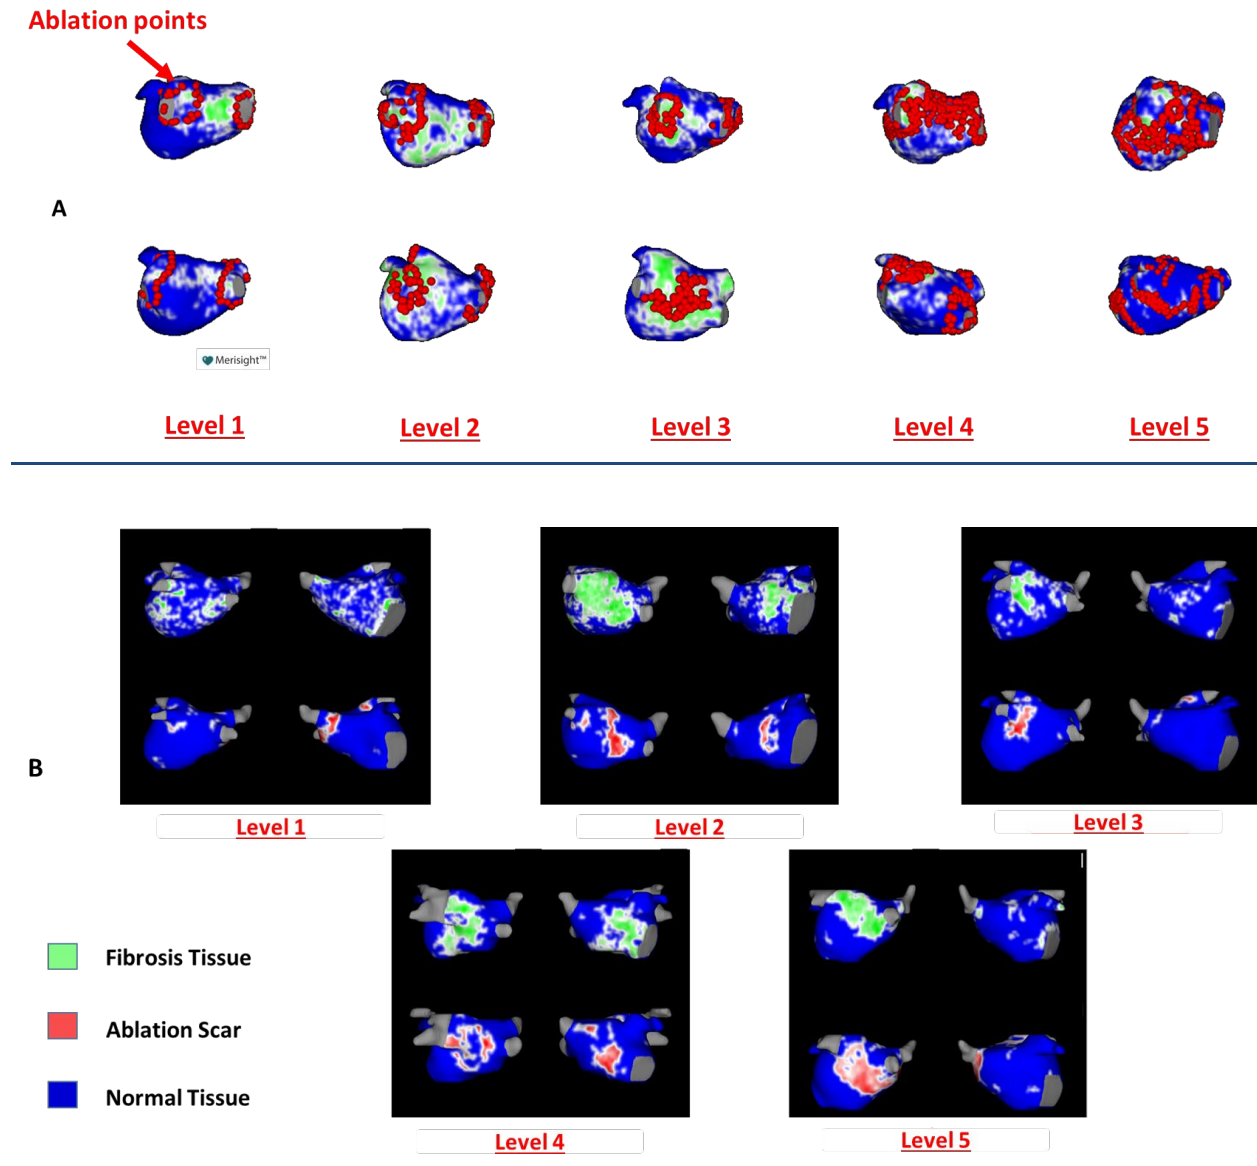

*Level 1: No or little fibrosis covered/encircled Level 2 Some fibrosis covered/encircled Level 3: About half of fibrosis covered/encircled Level 4: Majority of fibrosis covered/encircled and Level 5: Nearly all or all fibrosis covered/encircled*

**Targeted Fibrosis:** Baseline atrial fibrosis (green) covered by ablation points during the procedure

**Scar-Covered/Encircled Fibrosis:** Baseline atrial fibrosis (green) covered or encircled by the ablation induced scar as assessed on the 3-month MRI (red)

***eFigure 2.- Completeness of ECG Transmissions in Both Treatment Arms***

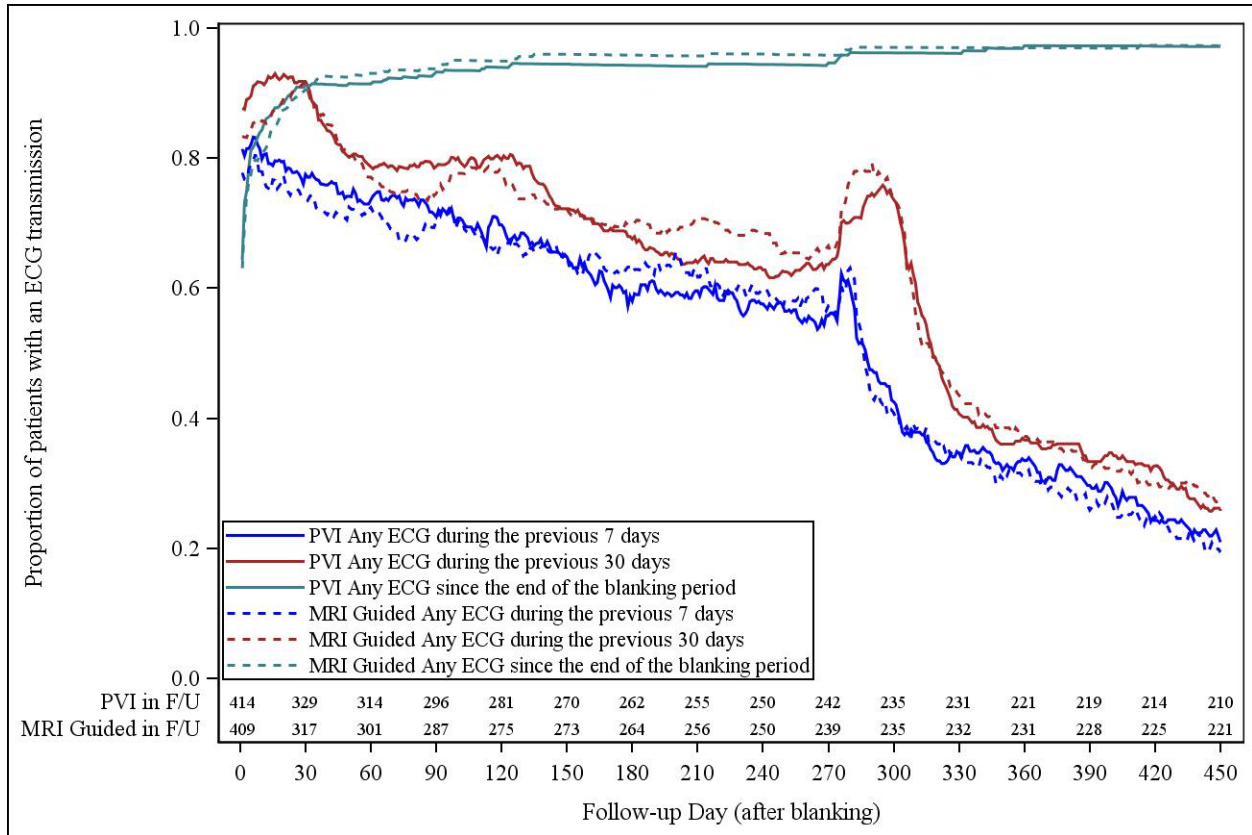

The horizontal axis in the plot indicates the follow-up day after the end of the blanking period. The two rows of numbers at the bottom of the plot indicate the number of randomized subjects without a previous primary outcome event. These numbers exceed the number of patients who remain at risk for the primary endpoint in Figure 2 because they include patients who have discontinued follow-up assessments. The blue curves indicate the proportions of these subjects with at least one ECG reading in the 1-week period immediately preceding the follow-up day indicated by the horizontal axis. The red curves indicate the proportion of these same subjects who provided at least one ECG reading during the previous 30 days. The green curves indicate the proportions of these same subjects with at least one ECG reading any time after the blanking period prior to that day.

**eFigure 3.- Kaplan Meier Curve for the Primary End Point by Fibrosis Stages <20% (A) and ≥20% (B)**

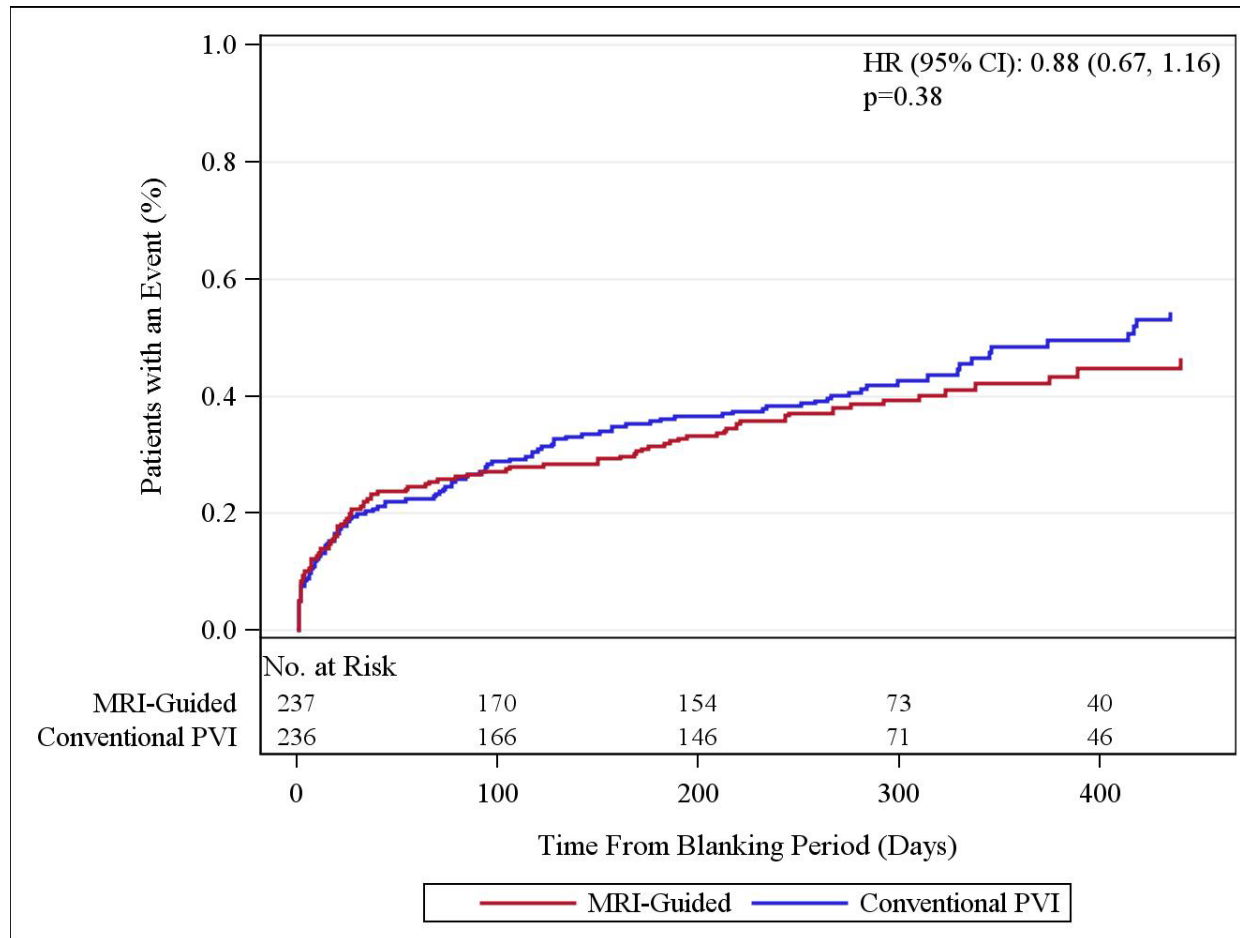

**Panel A**

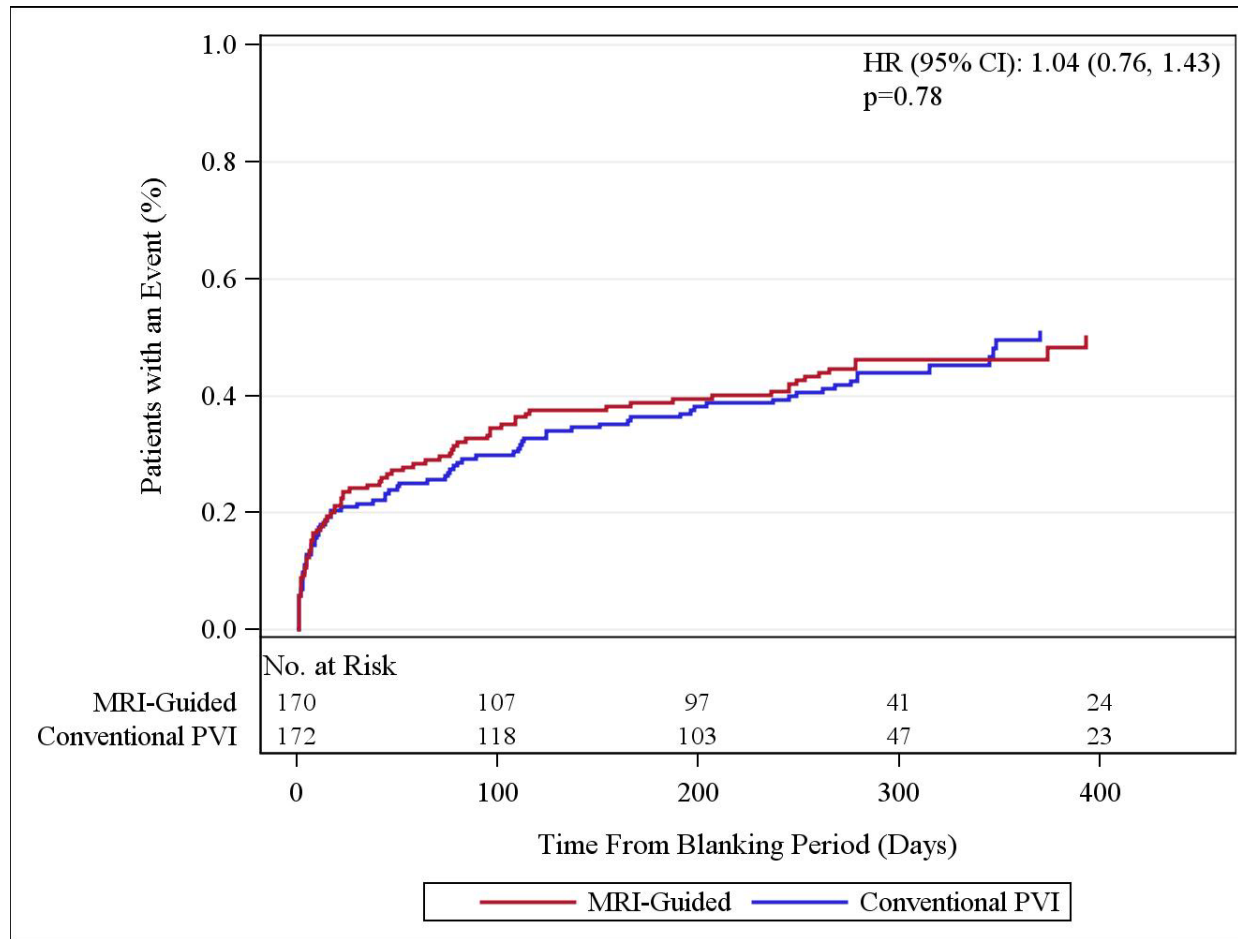

**Panel B**

The analysis was performed in the subgroups of the modified intent-to-treat population with baseline fibrosis  $\leq 20\%$  (Panel A) and with baseline fibrosis  $> 20\%$  (Panel B). Follow-up times are expressed in days following the end of the 90 day blanking period. Entries at the bottom indicate the number of patients remaining at risk at the indicated follow-up times without a prior AA-recurrence event.

## Tables

*eTable1.- Eligibility Criteria*

|                                                                                                                                                              |
|--------------------------------------------------------------------------------------------------------------------------------------------------------------|
| <b><u>Inclusion Criteria</u></b>                                                                                                                             |
| Patients with persistent AF defined as 7 days or more of AF as evidenced by rhythm strips or written documentation                                           |
| Undergoing first AF ablation as per recent HRS consensus document                                                                                            |
| Age $\geq$ 18 years                                                                                                                                          |
| <b><u>Exclusion Criteria</u></b>                                                                                                                             |
| Previous left atrial ablation or any type of valvular surgery                                                                                                |
| Contraindication for DE-MRI with a full dose of contrast agent                                                                                               |
| Contraindication to beta blockers, if necessary, for DE-MRI                                                                                                  |
| Women currently pregnant                                                                                                                                     |
| Mental or physical inability to take part in the study                                                                                                       |
| Inability to be placed in MRI due to body mass or body habitus                                                                                               |
| Known terminally ill patients                                                                                                                                |
| Subjects without daily access to a smart phone compatible with the ECG Check application and ability to upload ECG tracings for the entire follow up period. |



**eTable 2.- Descriptive Statistics of Mean Fibrosis Covered/Encircled and Mean Fibrosis Targeted in Each Treatment Arm**

| <b>Effect</b>                          |  | <b>PVI-Only</b> | <b>MRI Guided</b> |
|----------------------------------------|--|-----------------|-------------------|
| <b>Mean Fibrosis Covered/Encircled</b> |  | (N=373)         | (N=362)           |
| Level 1 or more                        |  | 373 (100%)      | 362 (100%)        |
| Level 2 or more                        |  | 151 (40.5%)     | 255 (70.4%)       |
| Level 3 or more                        |  | 58 (15.5%)      | 162 (44.8%)       |
| Level 4 or more                        |  | 16 (4.3%)       | 70 (19.3%)        |
| Level 5                                |  | 0 (0%)          | 2 (0.6%)          |
| <b>Mean Fibrosis Targeted</b>          |  |                 |                   |
|                                        |  | (N=305)         | (N=335)           |
| Level 1 or more                        |  | 305 (100%)      | 335 (100%)        |
| Level 2 or more                        |  | 144 (47.2%)     | 324 (96.7%)       |
| Level 3 or more                        |  | 51 (16.7%)      | 271 (80.9%)       |
| Level 4 or more                        |  | 9 (3%)          | 179 (53.4%)       |
| Level 5                                |  | 0 (0%)          | 32 (9.6%)         |

*Level 1: No or little fibrosis covered/encircled*

*Level 2: Some fibrosis covered/encircled*

*Level 3: About half of fibrosis covered/encircled*

*Level 4: Majority of fibrosis covered/encircled*

*Level 5: Nearly all or all fibrosis covered/encircled*

***eTable 3. – Sensitivity Analyses for Estimating the Hazard Ratio Comparing the Primary Atrial-Arrhythmia Recurrence Composite Outcome Between the MRI-Guided and PVI-Only Treatment Groups***

| <b>Model</b>                                                                                      | <b>Hazard ratio and (95% confidence interval)</b> |
|---------------------------------------------------------------------------------------------------|---------------------------------------------------|
| Prespecified primary analysis, stratifying only for Utah Stage                                    | 0.95 (0.77,1.17)                                  |
| Post-hoc analysis, stratifying by Utah Stage and clinical center <sup>a</sup>                     | 0.94 (0.76,1.17)                                  |
| Post-hoc analysis, stratifying by Utah Stage with clinical center <sup>b</sup> as a random effect | 0.94 (0.77,1.16)                                  |

- a. Cox proportional hazards regression comparing the MRI and PVI-only interventions with the baseline hazard stratified by 88 strata defined by the 88 = 44 x 2 combinations of the 44 clinical sites with the 2 baseline fibrosis stages.
- b. Cox proportional hazards regression comparing the MRI and PVI-only interventions with the baseline hazard stratified by the 2 baseline fibrosis stages, with a gamma frailty model to account for variation in the baseline hazard across the 44 clinical sites.

**eTable 4A. - Effects of Randomized Interventions on Quality of Life Outcomes**  
**Prespecified Analysis**

|                                                    | Baseline      | Adjusted Mean Change from Baseline to 3 Months |                    |                                                  |         | Adjusted Mean Change from Baseline to 12 Months |                    |                                                  |         |
|----------------------------------------------------|---------------|------------------------------------------------|--------------------|--------------------------------------------------|---------|-------------------------------------------------|--------------------|--------------------------------------------------|---------|
|                                                    | Mean (SD)     | MRI-Guided Mean (SE)                           | PVI Only Mean (SE) | Difference MRI-Guided vs. PVI Only Mean (95% CI) | P-Value | MRI-Guided Mean (SE)                            | PVI Only Mean (SE) | Difference MRI-Guided vs. PVI Only Mean (95% CI) | P-Value |
| Toronto Atrial Fibrillation Symptom Severity Score | 12.29 (8.05)  | -5.48 (0.37)                                   | -6.17 (0.37)       | 0.69 (-0.19, 1.58)                               | 0.12    | -6.80 (0.37)                                    | -6.42 (0.36)       | -0.38 (-1.23, 0.47)                              | 0.38    |
| SF-36 Physical Health Composite                    | 42.62 (10.18) | 5.47 (0.47)                                    | 6.14 (0.47)        | -0.67 (-1.88, 0.54)                              | 0.28    | 6.30 (0.52)                                     | 6.29 (0.51)        | 0.00 (-1.33, 1.33)                               | 0.99    |
| SF-36 Mental Health Composite                      | 45.24 (10.93) | 4.55 (0.52)                                    | 5.12 (0.52)        | -0.57 (-1.89, 0.76)                              | 0.40    | 5.31 (0.54)                                     | 5.54 (0.53)        | -0.23 (-1.61, 1.15)                              | 0.74    |

The Toronto Atrial Fibrillation Severity Score was measured for 821, 739 and 700 randomized subjects who received ablation at baseline, 3 months and 12 months, respectively. The SF-36 was administered for 831, 811, and 786 subjects at baseline, 3 months and 12 months. Baseline means and SD were computed without adjustment from all available baseline data. Adjusted mean changes from baseline to 3 and 12 months were estimated within each treatment group and compared between treatment groups using a constrained mixed effects model in which baseline means were assumed equal between the randomized groups with adjustment for baseline fibrosis stratum and with an unstructured covariance matrix to account for serial correlation.

***eTable 4B. - Effects of Randomized Interventions on Quality of Life Outcomes  
Post-hoc Sensitivity Analysis Including Site as a Random Effect***

|                                                    | Baseline      | Adjusted Mean Change from Baseline to 3 Months |                    |                                                  |         | Adjusted Mean Change from Baseline to 12 Months |                    |                                                  |         |
|----------------------------------------------------|---------------|------------------------------------------------|--------------------|--------------------------------------------------|---------|-------------------------------------------------|--------------------|--------------------------------------------------|---------|
|                                                    | Mean (SD)     | MRI-Guided Mean (SE)                           | PVI Only Mean (SE) | Difference MRI-Guided vs. PVI Only Mean (95% CI) | P-Value | MRI-Guided Mean (SE)                            | PVI Only Mean (SE) | Difference MRI-Guided vs. PVI Only Mean (95% CI) | P-Value |
| Toronto Atrial Fibrillation Symptom Severity Score | 12.29 (8.05)  | -5.44 (0.37)                                   | -6.16 (0.37)       | 0.72 (-0.15, 1.59)                               | 0.11    | -6.78 (0.36)                                    | -6.42 (0.36)       | -0.36 (-1.20, 0.48)                              | 0.40    |
| SF-36 Physical Health Composite                    | 42.62 (10.18) | 5.45 (0.47)                                    | 6.14 (0.47)        | -0.69 (-1.88, 0.51)                              | 0.26    | 6.30 (0.51)                                     | 6.31 (0.51)        | -0.01 (-1.31, 1.30)                              | 0.99    |
| SF-36 Mental Health Composite                      | 45.24 (10.93) | 4.53 (0.52)                                    | 5.12 (0.52)        | -0.59 (-1.91, 0.73)                              | 0.38    | 5.29 (0.54)                                     | 5.55 (0.53)        | -0.25 (-1.63, 1.12)                              | 0.72    |

The Toronto Atrial Fibrillation Severity Score was measured for 821, 739 and 700 randomized subjects who received ablation at baseline, 3 months and 12 months, respectively. The SF-36 was administered for 831, 811, and 786 subjects at baseline, 3 months and 12 months. Baseline means and SD were computed without adjustment from all available baseline data. Adjusted mean changes from baseline to 3 and 12 months were estimated within each treatment group and compared between treatment groups using a constrained mixed effects models in which baseline means were assumed equal between the randomized groups with adjustment for baseline fibrosis stratum, inclusion of clinical site as a random effect, and with an unstructured covariance matrix to account for serial correlation.

**eTable 5. - Efficacy Outcomes by Fibrosis Stages: A <20% and B ≥20%<sup>a</sup>**

**A. Baseline fibrosis < 20%**

|                                                                                                                 | MRI-guided<br>N=237 | PVI Only<br>N=236 | Risk difference<br>(95% Confidence Interval) <sup>b</sup> | Hazard Ratio<br>(95% Confidence<br>Interval) <sup>c</sup> | P-value <sup>d</sup> |
|-----------------------------------------------------------------------------------------------------------------|---------------------|-------------------|-----------------------------------------------------------|-----------------------------------------------------------|----------------------|
|                                                                                                                 | N (%)               | N (%)             |                                                           |                                                           |                      |
| Primary Outcome                                                                                                 |                     |                   |                                                           |                                                           |                      |
| Atrial arrhythmia recurrence or repeat ablation <sup>e</sup>                                                    | 97 (40.9)           | 109 (46.2)        | -0.037 (-0.117,0.042)                                     | 0.88 (0.67, 1.16)                                         | 0.37                 |
| Components of the Primary Outcome<br>(Atrial arrhythmia types) <sup>f</sup>                                     |                     |                   |                                                           |                                                           |                      |
| Atrial fibrillation                                                                                             | 75 (31.6)           | 80 (33.9)         | -0.018 (-0.096,0.062)                                     | 0.93 (0.68, 1.28)                                         | 0.66                 |
| Atrial flutter                                                                                                  | 15 (6.3)            | 19 (8.1)          | -0.020 (-0.076,0.034)                                     | 0.78 (0.40, 1.54)                                         | 0.47                 |
| Atrial tachycardia                                                                                              | 4 (1.7)             | 4 (1.7)           | -0.000 (-0.028,0.030)                                     | 0.98 (0.25, 3.91)                                         | 0.98                 |
| Secondary Outcomes                                                                                              |                     |                   |                                                           |                                                           |                      |
| Atrial arrhythmia, repeat ablation, or new atrial arrhythmia medication <sup>e,g</sup>                          | 99 (41.8)           | 116 (49.2)        | -0.058 (-0.139,0.025)                                     | 0.83 (0.64, 1.09)                                         | 0.17                 |
| Repeat Ablation <sup>h</sup>                                                                                    | 30 (12.7)           | 41 (17.4)         | -0.035 (-0.091,0.014)                                     | 0.73 (0.46, 1.17)                                         | 0.20                 |
| Post-hoc Outcome                                                                                                |                     |                   |                                                           |                                                           |                      |
| Atrial arrhythmia recurrence, repeat ablation, new atrial arrhythmia medication or cardioversion <sup>e,g</sup> | 101 (42.6)          | 118 (50)          | -0.060 (-0.142,0.025)                                     | 0.83 (0.63, 1.08)                                         | 0.16                 |

***eTable 5 (continued). Efficacy Outcomes by Fibrosis Stages: <20% and ≥20%***

***B. Baseline fibrosis ≥ 20%***

|                                                                                                                  | MRI-guided<br>N=170 | PVI Only<br>N=172 | Risk difference<br>(95% Confidence<br>Interval) <sup>b</sup> | Hazard Ratio<br>(95% Confidence<br>Interval) <sup>c</sup> | P-value <sup>d</sup> | Interaction P-value <sup>i</sup> |
|------------------------------------------------------------------------------------------------------------------|---------------------|-------------------|--------------------------------------------------------------|-----------------------------------------------------------|----------------------|----------------------------------|
|                                                                                                                  | N (%)               | N (%)             |                                                              |                                                           |                      |                                  |
| Primary Outcome                                                                                                  |                     |                   |                                                              |                                                           |                      |                                  |
| Atrial arrhythmia recurrence or repeat ablation <sup>e</sup>                                                     | 78 (45.9)           | 79( 45.9)         | 0.027 (-0.073,0.105)                                         | 1.09 (0.80- 1.50)                                         | 0.59                 | 0.32                             |
| Components of the Primary Outcome (Atrial arrhythmia types) <sup>f</sup>                                         |                     |                   |                                                              |                                                           |                      |                                  |
| Atrial fibrillation                                                                                              | 54 (31.8)           | 67( 39.0)         | -0.031 (-0.130,0.065)                                        | 0.90 (0.62, 1.29)                                         | 0.55                 | 0.87                             |
| Atrial flutter                                                                                                   | 18 (10.6)           | 7( 4.1)           | 0.080 (0.012,0.150)                                          | 2.82 (1.17, 6.80)                                         | 0.02                 | 0.02                             |
| Atrial tachycardia                                                                                               | 3 (1.8)             | 2( 1.2)           | 0.011 (-0.021,0.043)                                         | 1.80 (0.29, 11.00)                                        | 0.53                 | 0.60                             |
| Secondary Outcomes                                                                                               |                     |                   |                                                              |                                                           |                      |                                  |
| Atrial arrhythmia, repeat ablation, or new atrial arrhythmia medication <sup>e, g</sup>                          | 84 (49.4)           | 80 (46.5)         | 0.057 (-0.041,0.157)                                         | 1.19 (0.87, 1.62)                                         | 0.27                 | 0.09                             |
| Repeat Ablation <sup>h</sup>                                                                                     | 27 (15.9)           | 31 (18.0)         | -0.015 (-0.082,0.052)                                        | 0.90 (0.53- 1.50)                                         | 0.68                 | 0.57                             |
| Post-hoc Outcome                                                                                                 |                     |                   |                                                              |                                                           |                      |                                  |
| Atrial arrhythmia recurrence, repeat ablation, new atrial arrhythmia medication or cardioversion <sup>e, g</sup> | 86 (50.6)           | 80 (46.5)         | 0.068 (-0.031,0.170)                                         | 1.23 (0.90- 1.67)                                         | 0.19                 | 0.06                             |

***eTable 5 (continued). Efficacy Outcomes by Fibrosis Stages: <20% and ≥20%***

- a. Efficacy outcomes were evaluated in randomized patients who remained in follow-up after the 90 day blanking period.
- b. Risk differences calculated as the difference in risk of the outcome in the MRI guided group and the risk of the outcome in the PVI guided group by day 275 after the start of the blanking period. 95% CI are percentile confidence intervals from 2000 bootstrap samples.
- c. Hazard ratios were computed using Cox regression with baseline hazards stratified by baseline fibrosis stratum.
- d. P-values were computed from the log-rank test stratified by baseline fibrosis stratum.
- e. The analysis evaluates the listed events as a composite outcome, with the first occurrence of any of the listed events counted as the composite event for the analysis.
- f. Atrial arrhythmia type for atrial arrhythmia recurrences designating the primary outcome
- g. Only new initiations of atrial arrhythmia medications are included in the atrial arrhythmia medication component of this composite outcome.
- h. Repeat ablation is counted as an outcome even if there was an atrial arrhythmia recurrence, cardioversion or start of atrial arrhythmia medications prior to the repeat ablation date
- i. Interaction p-values compare hazard ratios for the MRI-guided vs. PVI only groups between the two baseline fibrosis strata (<20% vs. ≥20%).

Abbreviations: MRI *Magnetic Resonance Imaging*, PVI *Pulmonary Vein Isolation*

***eTable 6. – Details of Strokes in First 30 Days***

|           | Age (years) | Sex  | Stroke event                               | Day post-ablation | Baseline Fibrosis | Anticoagulation resumed post-ablation |
|-----------|-------------|------|--------------------------------------------|-------------------|-------------------|---------------------------------------|
| Patient 1 | 72          | Male | Left vision defect                         | 1                 | 17.5              | Yes                                   |
| Patient 2 | 62          | Male | Vision and speech disturbances             | 3                 | 26.9              | Yes                                   |
| Patient 3 | 67          | Male | Expressive dysphasia                       | 0                 | 23.3              | Yes                                   |
| Patient 4 | 67          | Male | Left vision defect                         | 1                 | 25.6              | Yes                                   |
| Patient 5 | 45          | Male | Left facial droop                          | 0                 | 7.9               | Yes                                   |
| Patient 6 | 72          | Male | In the context of Ventricular Fibrillation | 26                | 31.7              | Yes                                   |



***eTable 7.- Safety Outcomes by Fibrosis Stages*** <sup>a</sup>

|                                                                               | Baseline fibrosis < 20%              |                                    | Baseline fibrosis ≥ 20%              |                                    |
|-------------------------------------------------------------------------------|--------------------------------------|------------------------------------|--------------------------------------|------------------------------------|
|                                                                               | MRI Guided <sup>b</sup><br>(N = 234) | PVI Only <sup>b</sup><br>(N = 250) | MRI Guided <sup>b</sup><br>(N = 169) | PVI Only <sup>b</sup><br>(N = 178) |
| Bleeding requiring transfusion                                                | 1 (0.4%)                             | 0 (0%)                             | 0 (0%)                               | 0 (0%)                             |
| Heart Failure                                                                 | 0 (0%)                               | 0 (0%)                             | 1 (0.6%)                             | 0 (0%)                             |
| Pulmonary Vein Stenosis                                                       | 0 (0%)                               | 0 (0%)                             | 0 (0%)                               | 0 (0%)                             |
| Stroke/TIA                                                                    | 2 (0.9%)                             | 0 (0%)                             | 4 (2.4%)                             | 0 (0%)                             |
| Death                                                                         | 2 (0.9%)                             | 0 (0%)                             | 0 (0%)                               | 0 (0%)                             |
| Primary Composite Safety Outcome, defined as at least one of the above events | 4 (1.7%)                             | 0 (0%)                             | 5 (3.0%)                             | 0 (0%)                             |
| Esophageal Injury <sup>c</sup>                                                | 2 (0.9%)                             | 1 (0.4%)                           | 3 (1.8%)                             | 0 (0%)                             |
| Perforation/Tamponade <sup>c</sup>                                            | 2 (0.9%)                             | 4 (1.6%)                           | 3 (1.8%)                             | 1 (0.6%)                           |

- a. The safety outcomes were evaluated in the two baseline fibrosis subgroups of the safety population for the 30 day period following ablation.
- b. The safety outcomes were evaluated according to the received treatment intervention.
- c. Esophageal injury and perforation/tamponade were initially identified by clinical sites and reviewed by the trial’s medical monitor. Final classifications were made by a Safety Outcome Review Committee.

Abbreviations: TIA *Transient Ischemic Attack*, MRI *Magnetic Resonance Imaging*, PVI *Pulmonary Vein Isolation*
